# Supplementary material for: Azathioprine Has a Deleterious Effect on the Bone Health of Mice with DSS-Induced Inflammatory Bowel Disease
Source: PubMed Central journal article supplement (PMC6929096; doi:10.3390/ijms20236085), 2019-12-03
Supplement: ijms-20-06085-s001.pdf [file ijms-20-06085-s001.pdf]

|        | Groups                                    | Significance | P value |
|--------|-------------------------------------------|--------------|---------|
| Day 5  | non-DSS/vehicle vs. DSS/vehicle           | **           | 0.0011  |
|        | non-DSS/vehicle vs. DSS/azathioprine      | ***          | 0.0006  |
|        | non-DSS/azathioprine vs. DSS/azathioprine | *            | 0.0384  |
| Day 6  | non-DSS/vehicle vs. DSS/vehicle           | ****         | <0.0001 |
|        | non-DSS/vehicle vs. DSS/azathioprine      | ****         | <0.0001 |
|        | DSS/vehicle vs. non-DSS/azathioprine      | ***          | 0.0001  |
|        | non-DSS/azathioprine vs. DSS/azathioprine | ****         | <0.0001 |
| Day 7  | non-DSS/vehicle vs. DSS/vehicle           | ****         | <0.0001 |
|        | non-DSS/vehicle vs. DSS/azathioprine      | ****         | <0.0001 |
|        | DSS/vehicle vs. non-DSS/azathioprine      | ***          | 0.0001  |
|        | non-DSS/azathioprine vs. DSS/azathioprine | ****         | <0.0001 |
| Day 8  | non-DSS/vehicle vs. DSS/vehicle           | ***          | 0.0001  |
|        | non-DSS/vehicle vs. DSS/azathioprine      | ****         | <0.0001 |
|        | non-DSS/azathioprine vs. DSS/azathioprine | ***          | 0.0006  |
| Day 9  | non-DSS/vehicle vs. DSS/vehicle           | **           | 0.0013  |
|        | non-DSS/vehicle vs. DSS/azathioprine      | ****         | <0.0001 |
| Day 10 | non-DSS/vehicle vs. DSS/vehicle           | *            | 0.0267  |
|        | non-DSS/vehicle vs. DSS/azathioprine      | **           | 0.0051  |
| Day 11 | non-DSS/vehicle vs. DSS/vehicle           | *            | 0.0195  |
|        | non-DSS/vehicle vs. DSS/azathioprine      | *            | 0.0256  |
| Day 12 | non-DSS/vehicle vs. DSS/vehicle           | **           | 0.0033  |
|        | non-DSS/vehicle vs. non-DSS/azathioprine  | *            | 0.0158  |
|        | non-DSS/vehicle vs. DSS/azathioprine      | ***          | 0.0008  |
| Day 13 | non-DSS/vehicle vs. DSS/vehicle           | ***          | 0.001   |
|        | non-DSS/vehicle vs. non-DSS/azathioprine  | **           | 0.002   |
|        | non-DSS/vehicle vs. DSS/azathioprine      | ****         | <0.0001 |
| Day 14 | non-DSS/vehicle vs. DSS/vehicle           | **           | 0.0067  |
|        | non-DSS/vehicle vs. non-DSS/azathioprine  | **           | 0.0028  |
|        | non-DSS/vehicle vs. DSS/azathioprine      | ***          | 0.0001  |
| Day 15 | non-DSS/vehicle vs. DSS/vehicle           | ***          | 0.0007  |
|        | non-DSS/vehicle vs. non-DSS/azathioprine  | ***          | 0.0001  |
|        | non-DSS/vehicle vs. DSS/azathioprine      | ****         | <0.0001 |
| Day 16 | non-DSS/vehicle vs. DSS/vehicle           | *            | 0.0105  |
|        | non-DSS/vehicle vs. non-DSS/azathioprine  | **           | 0.0059  |
|        | non-DSS/vehicle vs. DSS/azathioprine      | ****         | <0.0001 |
| Day 17 | non-DSS/vehicle vs. DSS/vehicle           | **           | 0.0045  |
|        | non-DSS/vehicle vs. non-DSS/azathioprine  | ***          | 0.0003  |
|        | non-DSS/vehicle vs. DSS/azathioprine      | ****         | <0.0001 |
| Day 18 | non-DSS/vehicle vs. DSS/vehicle           | ***          | 0.0001  |
|        | non-DSS/vehicle vs. non-DSS/azathioprine  | ****         | <0.0001 |
|        | non-DSS/vehicle vs. DSS/azathioprine      | ****         | <0.0001 |

Suppl. Table S1: Significance of weight changes between treatment groups of mice in DSS-study taken daily over the 18-day treatment period.

|                              |                                                                                                                                                                                     |
|------------------------------|-------------------------------------------------------------------------------------------------------------------------------------------------------------------------------------|
| <b>Inflammation severity</b> | 0 – none; 1 – mild; 2 – moderate; 3 – severe                                                                                                                                        |
| <b>Inflammation extent</b>   | 0 – none; 1 – mucosa; 2 – mucosa and submucosa; 3 – transmural                                                                                                                      |
| <b>Crypt damage</b>          | 0 – none; 1 – basal 1/3; 2 – basal 2/3; 3 – crypt loss, surface epithelium present; 4 – crypts and surface epithelium lost                                                          |
| <b>Regeneration</b>          | 0 – complete tissue regeneration or normal tissue; 1 – almost complete regeneration; 2 – regeneration with crypt depletion; 3 – surface epithelium not intact; 4 – no tissue repair |

Suppl. Table S2: Scoring criteria of colon pathology.

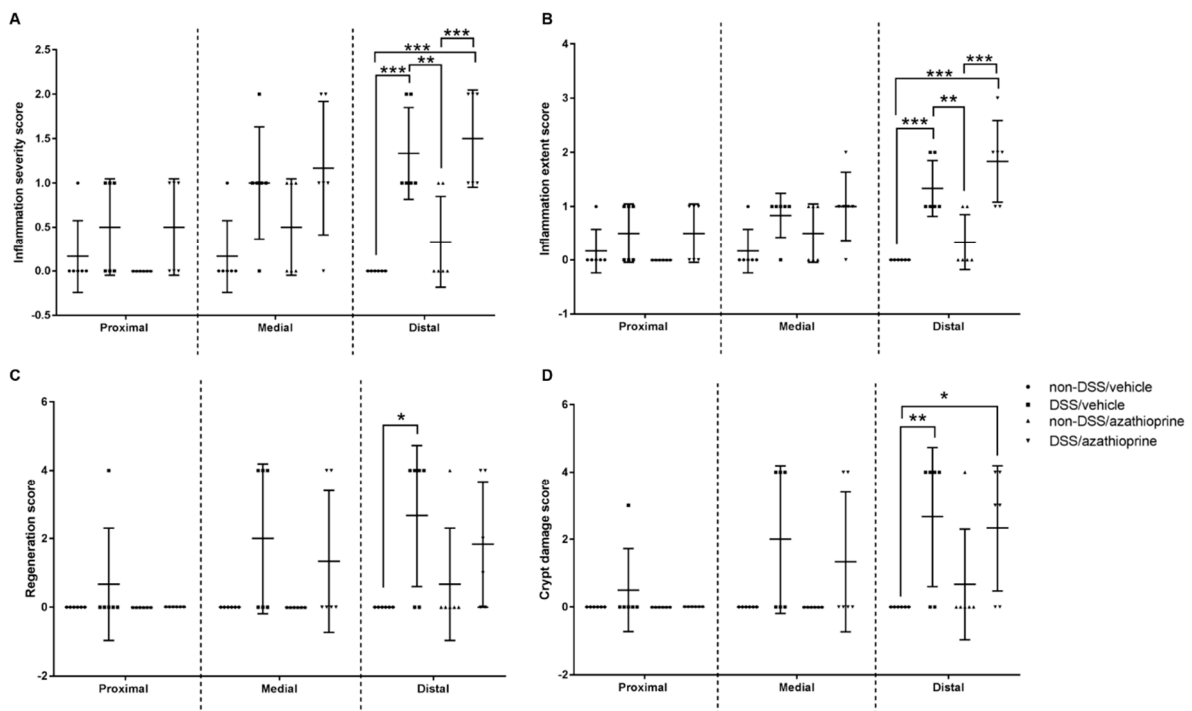

Suppl. Fig. S1: Colon pathology of azathioprine and vehicle treated mice treated with 3% DSS. Histological scoring of proximal, middle and distal regions of the colon (A) Inflammation severity score (B) Inflammation extent score (C) Regeneration score (D) Crypt damage score. Data are presented as mean ± S.D. (n=6/group). P<0.05\*, P<0.01\*\*, P<0.001\*\*\*.

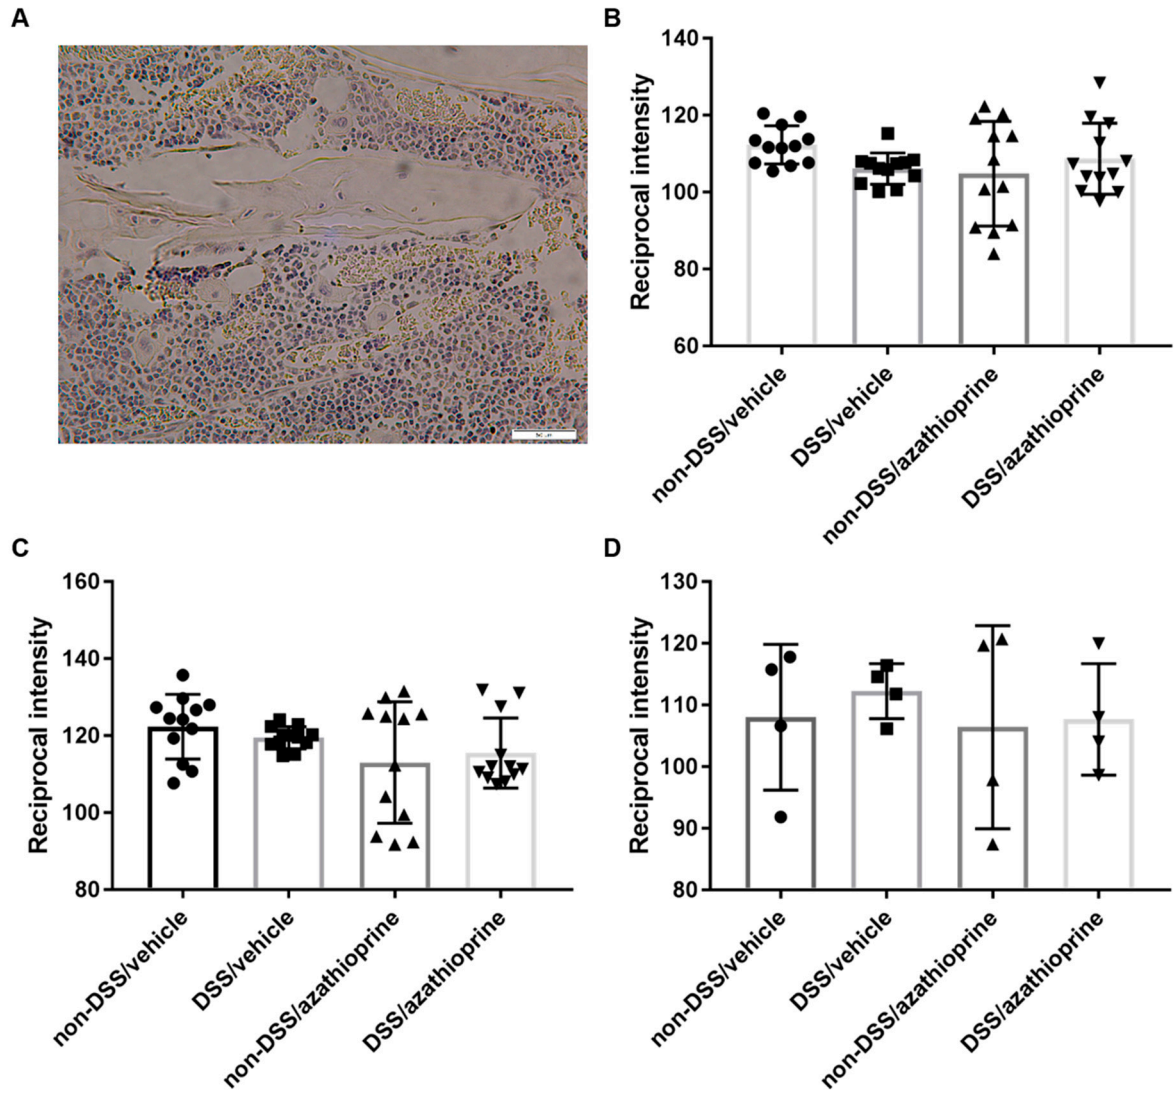

Suppl. Fig. S2: (A) Appropriate IgG control for LC3 immunolabelling. Scale bar = 50 $\mu$ m. Quantification of immunohistochemistry – reciprocal intensity of (B) osteoblasts (C) bone marrow (D) whole bone slice. Data are presented as mean  $\pm$  S.D.
